# Supplementary material for: PMAIP1, a novel diagnostic and potential therapeutic biomarker in osteoporosis
Source: publisher site journal article supplement (doi:10.18632/aging.205553), 2024-02-16
Supplement: Supplementary file [file aging-v16i4-205553-supplementary-material-SD2.pdf]

## SUPPLEMENTARY TABLE

**Supplementary Table 1. Primers used in this study.**

| Primers for qPCR |   |                                |
|------------------|---|--------------------------------|
| PMAIP1           | F | CGGAGCTGGAAGTCGAGTGT           |
|                  | R | TTCCTGAGCAGAAGAGTTTGGATA       |
| H1FX-AS1         | F | TTGCCGCTGATGTTCCCA             |
|                  | R | GTTCCCGCCATCATTTCCC            |
| AC009501.4       | F | AAGGGCTTGTTTCTGGCTATGTT        |
|                  | R | GTGGTTGCGTTTCACTGTAAGGA        |
| RP11-5P4.2       | F | TCAGGAAGTCAGCCATGCTAAAC        |
|                  | R | CTTGCCTGCTCACGATTGTTTC         |
| RP4-607I7.1      | F | CCTACTCATGTGAGGAAACCAGC        |
|                  | R | AGTCCTGGGCATGGGAAGTAG          |
| RP5-857K21.4006  | F | TCAACAGGAGGAGATAAGGAAGCT       |
|                  | R | CAGCTCAGGAAGATGACTCAGGG        |
| miR-200b-3p      | F | ACACTCCAGCTGGGTAATACTGCCTGGTAA |
|                  | R | TGGTGTCGTGGAGTCG               |
| miR-624-3p       | F | ACACTCCAGCTGGGCACAAGGTATTGGTA  |
|                  | R | TGGTGTCGTGGAGTCG               |
| OCN              | F | CACTCCTCGCCCTATTGGC            |
|                  | R | CCCTCCTGCTTGGACACAAAG          |
| OPN              | F | CTCCATTGACTCGAACGACTC          |
|                  | R | CAGGTCTGCGAAACTTCTTAGAT        |
| RUNX2            | F | TGGTACTGTCATGGCGGGTA           |
|                  | R | TCTCAGATCGTTGAACCTTGCTA        |
| GAPDH            | F | GGAAGCTTGTCATCAATGGAAATC       |
|                  | R | TGATGACCCTTTTGGCTCCC           |
| U6               | F | CTCGCTTCGGCAGCACA              |
|                  | R | AACGCTTCACGAATTGCGT            |
